# Disease implications of animal social organization and network structure - a quantitative analysis

Pratha Sah <sup>\*a</sup>, José David Méndez<sup>a</sup> and Shweta Bansal<sup>a,b</sup>

<sup>a</sup>Department of Biology, Georgetown University, Washington, DC

<sup>b</sup>Fogarty International Center, National Institutes of Health,  
Bethesda, MD, USA

\*Corresponding author: prathasah@gmail.com

## Summary

1. Networks are being increasingly used to quantify interaction patterns of a broad range of social systems ranging from solitary to eusocial species. Social behavior driving the complexity of interaction networks has important consequences towards infectious disease transmission.
2. Prior studies however have been species and population specific, which highlights the need to develop a general theory towards the implications of social

---

\*prathasah@gmail.com

behavior on disease risk.

3. We used quantitative tools to review the commonalities and differences in the structure of 666 published interaction networks from 47 non-human species categorized into four social systems - *relatively solitary*, *fission-fusion*, *social* and *socially hierarchical* species. Additionally, we determined the disease costs of sociality due to the underlying interaction network structure.
4. We found that the interaction networks of *solitary* species have the highest variation in individual's social partners, while the interaction networks of *fission-fusion* species were the most fragmented.
5. Disease simulations show that the structure of interaction networks can alleviate the disease costs of group living for *social*, but not *socially hierarchical* species.
6. We also find clear differences between the four social systems in terms of behavioral plasticity of individuals towards increasing group size. *Socially hierarchical* species maintained network connectivity with increasing group size, whereas non-hierarchical *social* species reduced effort towards each pairwise interaction to offset the higher amount of energy invested in engaging with new social partners.
7. Our findings offer new perspective on the debate about the disease costs of group living by evaluating how social organization strategies mediate pathogen pressures.

# Keywords

animal social network, contact network, epidemiology, infectious disease dynamics, meta-analysis, social behavior, social complexity, wildlife disease

# Introduction

1 Animal societies are increasingly being recognised as complex, including species  
2 that have traditionally been considered as solitary. Over the past 20-30 years,  
3 modern technology has enabled researchers to quantify the social structure in  
4 animal societies using tools from network analysis. Mathematically, networks de-  
5 scribe interactions between a set of nodes by placing edges connecting the nodes.  
6 Social network approaches have been used in the literature to document animal  
7 interactions in multiple different contexts, including aggressive encounters (Casey  
8 *et al.*, 2015), affiliative contacts (e.g., grooming, Franz, Altmann & Alberts (2015),  
9 trophallaxis, Quevillon *et al.* (2015)), and spatial proximity (Reynolds *et al.*, 2015).  
10 Social networks quantify heterogeneity in individual behaviour, and network  
11 analysis has consequently been used to examine the relationship between individ-  
12 ual behaviour and its social network position (Aplin *et al.*, 2013; Krause *et al.*,  
13 2016). For example, gregarious or high-ranking individuals interact with a greater  
14 proportion of individuals in a group and tend to occupy central positions in the  
15 social network (Krause *et al.*, 2014). Individual position within the social net-  
16 work is known to be associated with several benefits such as reproductive success  
17 (Wey *et al.*, 2013), access to mates (Oh & Badyaev, 2010), longevity (Silk *et al.*,  
18 2010), defense against predators (Krause *et al.*, 2016), increased access to resources

19 (Aplin *et al.*, 2012) and offspring survival (Silk *et al.*, 2009). Higher frequency of  
20 affiliative, agonistic and mating contacts, however, is also associated with elevated  
21 risk of pathogen transmission (Godfrey *et al.*, 2009).

22 The perceived difference in the costs and benefits of group living is expected to  
23 modulate individual's behavior (Kurvers *et al.*, 2014), as well as the structure of  
24 the local and global social network. However, while previous studies have focused  
25 on how the position within a social network affects an individual's fitness, few have  
26 explored the relationship between species sociality and network structure. Faust  
27 & Skvoretz (2002) compared 42 networks across human, animal and bird species  
28 and found network similarity to be dependent on the interaction type rather than  
29 the taxonomic classification. A follow-up study that compared 51 human and non-  
30 human social networks pointed out the difficulties in comparing network structures  
31 across taxa, as most of the global network properties are constrained by network  
32 size and edge density (Faust, 2006). Comparative studies of primate social net-  
33 works have shown an association between neocortex size, which is linked to higher  
34 social ability, with network density, connectivity, and global network efficiency  
35 (Lehmann & Dunbar, 2009; Pasquaretta *et al.*, 2014). Lusseau & Newman (2004)  
36 compared the structure of dolphin social networks with known features of human  
37 social networks (positive degree homophily, preferential association by age), but  
38 no formal statistical comparisons were made. Other recent attempts have been  
39 limited to closely related species (e.g., comparison of grevy's zebra, *Equus grevyi*  
40 and onager, *Equus hemionus* by Sundaresan *et al.* (2007)).

41 Socially complex species with higher cognitive abilities are typically thought  
42 to live in larger groups (Dunbar, 1992; Lindenfors, 2005) and have elevated costs  
43 of disease transmission due to high contact rates (Loehle, 1995; Altizer *et al.*,

2003). While social complexity is assumed to be synonymous with higher network complexity, research on the interaction patterns of less social and solitary species have suggested that this is not necessarily true. For example, the analysis of the association data in blacktip reef sharks, *Carcharhinus melanopterus* (Mourier, Vercelloni & Planes, 2012), desert tortoises, *Gopherus agassizii* (Sah *et al.*, 2016), and raccoons, *Procyon lotor* (Hirsch *et al.*, 2013) demonstrate that individuals form non-random and social preferences, even though they are typically considered as solitary species. The expectation of higher disease costs of sociality have also been weakly supported in the previous literature (Arnold & Anja, 1993; Rifkin, Nunn & Garamszegi, 2012; Patterson & Ruckstuhl, 2013). It has been argued that higher sociality might also have selected for behavioral mechanisms, life history traits, or physiology that alleviates or even confers higher disease resistance as compared to less social species (Loehle, 1995; Cremer, Armitage & Schmid-Hempel, 2007; Meunier, 2015). Recent mathematical models predict that the network structure itself, under certain conditions, can serve as a primary defense mechanism against infectious disease by lowering the risk of disease invasion and spread in socially complex species, without requiring an additional increase in physiological immunocompetence or behavioral avoidance (Hock & Fefferman, 2012). However, to our knowledge, there are no empirical evidences till date towards this prediction.

Another aspect to consider in evaluating the disease costs of social complexity is how disease transmission scales across groups (i.e., of the same species) of different sizes. This is important because group sizes can range over several orders of magnitude, even in similar environmental conditions (Sjoberg, Albrechtsen & Hjalten, 2000; Griesser *et al.*, 2011). Accurate predictions of disease costs across spatially distinct groups can be made using the knowledge of how host interaction

69 network scales with group size (Ferrari *et al.*, 2011). Scaling of host contacts and  
70 pathogen transmission rate is ultimately determined by the behavioral plasticity  
71 at the individual level. Change in group size can act as potent stressors to animals  
72 because it can increase the cost of group living, but on the other hand, larger  
73 group sizes may also improve group-living benefits (e.g., protection against preda-  
74 tors and reproductive success). The social behaviour of an individual towards its  
75 group members, therefore, changes depending on the perceived trade-off between  
76 the costs and the benefits of larger group size (Vander Wal, Yip & McLaugh-  
77 lin, 2012; Cross *et al.*, 2013; Gogarten *et al.*, 2014; Hubbard & Blumstein, 2015).  
78 The behavioral plasticity associated with group size has important implications  
79 towards infectious disease spread. If the costs of larger group size surpass the  
80 benefits, then animals may limit their energy invested in social interaction and  
81 restrict social partners to a smaller proportion of the total group size. This, under  
82 constant spatial area conditions, is analogous to the frequency-dependent model  
83 of disease transmission, where contact rate saturates with increasing host density.  
84 On the other hand, when there are higher perceived benefits of larger groups, then  
85 individuals may invest more energy interacting with larger proportion of group  
86 members. An increase in association rates with an increase in group-size may re-  
87 sult in increased disease transmission from infected to susceptible host members,  
88 which is analogous to density-dependent scaling of disease transmission. Most  
89 empirical studies on the subject however have been species-specific and document  
90 specific interaction type, making it difficult to infer the relationship between group  
91 size and pathogen scaling across different social systems.

92 In this study, we conduct a quantitative analysis of 666 interaction networks  
93 across 47 non-human species to investigate the relationship between social organi-

94 zation, network complexity, and the costs of disease transmission. This is achieved  
 95 in three steps. First, we use phylogenetically-controlled Bayesian MCMC models  
 96 to identify the differences in network structures associated with different social  
 97 systems. Second, disease simulations are performed to determine the role of var-  
 98 ious network measures in curbing the invasion of a novel pathogen and limiting  
 99 the spread of infectious diseases. Finally, we identify the relative costs of disease  
 100 transmission for each social system as mediated by their network structures. Be-  
 101 cause group sizes are inherently dynamic in nature, we also compare behavioral  
 102 plasticity of individuals towards increasing group size to determine how pathogen  
 103 transmission scales across groups of different social systems.

104 It is becoming increasingly clear that the disease implications of social com-  
 105 plexity depend on the structure of interaction networks rather than a simple de-  
 106 pendence on group size for social groups. Network comparisons across species  
 107 are however often not straightforward, especially when networks vary in size and  
 108 connection density (James, Croft & Krause, 2009). This work, by broadening the  
 109 scope of network analysis from being just species-specific to a meta-analytic ap-  
 110 proach, provides new insights towards how the organization of interaction patterns  
 111 can mediate disease costs of sociality. A better understanding of the association  
 112 between network structure and species sociality, in the future, can facilitate the  
 113 development of an index that quantifies the spectrum of sociality levels observed  
 114 across the taxonomic boundaries.

# Results

## Structure of interaction networks associated with the social systems

We obtained 666 interaction networks spanning 47 non-human species and 18 taxonomic orders (Fig. 1). Edge connections of these networks summarized different types of interaction between individuals, including food sharing (trophallaxis), grooming, physical contact, and spatial proximity. Fig. 1 summarizes the species, their phylogenetic relationships, the number of networks available for each species and the type of interaction recorded. We classified the animal species in our database into four broad categories of sociality - relatively solitary, fission-fusion, social, and socially hierarchical. *Relatively solitary* species were defined as the species where adults infrequently interact with other adults outside the mating period. Examples of *relatively solitary* species in the database include the desert tortoise (*Gopherus agassizii*), raccoons (*Procyon lotor*), and the Australian sleepy lizard (*Tiliqua rugosa*). Species that change the composition of their groups by the means of fission and fusion of subunits were classified as *fission-fusion*. *Social* species were defined as the species where adults engage in prolonged interactions with other adults outside of breeding periods. We defined *socially hierarchical* as non fission-fusion species typically characterized by a permanent (such as ants) or temporary (e.g. baboons) social hierarchy (Grueter *et al.*, 2012; de Silva, Schmid & Wittemyer, 2016).

To determine how the structure of interaction networks is different across the social systems, we used a phylogeny-based, Bayesian generalized linear mixed



model with the four sociality levels as the categorical response. The following network measures were included as predictors in the model (see Table S1 in the Supplementary Information for definitions): degree heterogeneity, degree homophily, clustering coefficient, weighted clustering coefficient, transitivity, betweenness centrality, weighted betweenness centrality, average group size, network fragmentation, group cohesion, relative modularity and network diameter. We found several network measures to be collinear with Variance Inflation factor (VIF) value of more than 3. These metrics were therefore removed from the analysis, and the final model consisted of five network measures - degree heterogeneity, degree homophily, betweenness centrality, group cohesion and network fragmentation (along with the number of nodes, number of edges and average edge weight to control for different sampling designs) (Table 1, Fig. 2). We found that the interaction networks of *relatively solitary* species were more likely to have the highest degree heterogeneity as compared to the other three social systems (pMCMC < 0.05, Table 1). The interaction networks of *fission-fusion* species, on the other hand, tended to be more fragmented in comparison to *solitary*, *social* and *socially hierarchical* species. In addition, social species had more fragmented interaction networks as compared to *solitary* species. No difference was detected in the average betweenness centrality measure between the *solitary* and the social systems. *Socially hierarchical* species, however, had a higher average betweenness centrality than the *fission-fusion* species, which indicates that individuals of hierarchical social systems occupy more central positions within the interaction networks. No difference was detected between the four social systems in terms of individuals' preference to associate with socially similar others (degree homophily) or preference to interact with members of own social group (group cohesion).

## 163 Disease implications of network structure and the social sys- 164 tems

165 Comparisons of interaction networks in our database revealed differences between  
166 the network structure of relatively solitary, fission-fusion, social and socially hierar-  
167 chical species. Do these differences in network measures also influence the disease  
168 costs of social organization? To answer this question, we performed Susceptible-  
169 Infected-Recovered disease simulations through the interaction networks in our  
170 database. Three measures relevant to disease management were used to summa-  
171 rize the simulations: (a) Proportion of individuals infected in the network (out-  
172 break size) that estimates the total burden of mortality (or morbidity), (b) the  
173 duration of infectious disease spread (outbreak duration), which estimates how  
174 quickly the infection spreads through the network and therefore the time duration  
175 within which disease control/management interventions have to be employed, and  
176 (c) epidemic probability, that measures the likelihood of an infectious disease in-  
177 vasion turning into a large outbreak (viz., outbreaks that infect at least 15% of  
178 the individuals in the network).

179 In Fig. 3 we consider the disease costs of social organization for low, moderate  
180 and highly transmissible pathogen (see Fig. S1 in Supporting Information for  
181 the results on an extended range of pathogen transmissibility values). Disease  
182 simulations show that *socially hierarchical* species experience the largest disease  
183 outbreaks as compared to the other social systems, and have longer outbreaks of  
184 low transmissible infections. *Social* species, on the other hand, experience the  
185 lowest outbreak size from low and moderately transmissible pathogens, although  
186 the outbreak sizes were not significantly smaller than the outbreaks in *fission-*

187 *fusion* species. The risk of disease outbreaks turning into epidemics was lowest in  
188 *relatively solitary* and *social* species for moderately transmissible infections. For  
189 highly transmissible infections, however, only *solitary* species demonstrate a low  
190 epidemic probability as compared to the other social systems.

191 The differences in the disease costs observed across the four social systems can  
192 be explained in terms of the organization of their underlying network structure,  
193 and its role in influencing disease transmission (Fig. 4, Fig. S2). Interaction net-  
194 works of *socially hierarchical* species have lower degree heterogeneity as compared  
195 to solitary species, and lower fragmentation as compared to fission-fusion species  
196 (Table 1). Our disease simulations show that low degree heterogeneity and less  
197 subdivided networks cause larger outbreaks for most levels of pathogen contagious-  
198 ness (Fig. 4). Highly fragmented networks of *fission-fusion* species, and highly  
199 degree-heterogeneous interaction networks of *solitary* species, therefore, tend to ex-  
200 perience smaller outbreaks than *socially hierarchical* species. Interaction networks  
201 of *social* species are more subdivided than *solitary* species; disease outbreaks in  
202 these species, therefore, tend to be smaller as compared to *socially hierarchical*  
203 species. Interestingly, outbreaks of highly transmissible infection in highly frag-  
204 mented networks are more likely to turn into epidemics (Fig. 4). This, along with  
205 the negative association between degree heterogeneity and epidemic probability  
206 explains why outbreaks of highly transmissible pathogen in networks of *solitary*  
207 species (that are less fragmented than *social* and *fission-fusion* species, and are  
208 highly degree heterogeneous) are less likely to turn into epidemics as compared to  
209 the other social systems.

## 210 Behavioral plasticity of individuals in different social systems 211 towards increasing group size

212 Since interaction networks are inherently dynamic in nature and pathogen trans-  
213 mission rate can vary with group size, we next examined how individuals of dif-  
214 ferent social groups modulate their interactions with increasing group size. We  
215 identified social groups within each interaction network using the community de-  
216 tection algorithm as described by Blondel *et al.* (2008). Only those interaction  
217 networks in our database that showed strong modular subdivisions (relative mod-  
218 ularity,  $Q_{rel} > 0.3$ ) were considered for the analysis. For each network, we calculated  
219 the four following measures of behavioral response towards increasing group size -  
220 average individual degree, average individual strength, average pairwise strength  
221 and group connectivity (see Table S1 for definitions).

222 Social plasticity of individuals towards increasing group size showed clear dif-  
223 ferences between the four social systems (Fig. 5). Individuals of all social systems  
224 interacted with more group members as the group size increased, but the largest  
225 increase in the number of social partners was observed in *socially hierarchical*  
226 species (Average individual degree, Figure 5). *Solitary* species, on the other hand,  
227 demonstrated the largest increase in average individual strength with larger group  
228 sizes, followed by *fission-fusion* and *socially hierarchical* species (Average individ-  
229 ual strength, Figure 5B), which indicates that solitary individuals invest a higher  
230 amount of energy towards social interaction with members of larger groups as  
231 compared to other social systems. On a dyadic level, pairwise interaction strength  
232 decreased for *social* species, suggesting that the individuals reduce effort towards  
233 each pairwise interactions in order to offset the increase in energy spent engaging

with new social partners in larger groups. In contrast, the amount of energy invested on pairwise interactions in *solitary*, *fission species* and *socially hierarchical* species did not change with increasing group size. Overall, group connectivity of *socially hierarchical* species remained unchanged in larger groups (Group connectivity, Figure 5). Larger group sizes, however, led to a decrease in connectivity for *solitary*, *fission-fusion* and *social* species.

## Discussion

Comparative studies are a powerful approach for testing ecological and evolutionary hypotheses. Network comparisons, however, are not straight-forward, as several topological measures depend on network size and edge density (James, Croft & Krause, 2009). Different data-collection methodology, sampling scheme, and edge weighting criteria can also create biases while comparing social networks (Castles *et al.*, 2014). Beyond the differences in data sampling method and network size, comparing local network features is challenging as several metrics are correlated to each other (Farine & Whitehead, 2015). It is therefore not surprising that few studies have attempted to compare networks across different taxonomic groups and sampling schemes. This study, to our knowledge, is the first attempt to utilize an extensive database of non-human social networks to understand the disease costs of species sociality due to the underlying network structure. We demonstrate how comparative studies can be performed by accounting for variation in group sizes, network connectivity and edge weighting criteria.

**Social systems and the structure of the interaction networks.** Social organization of species can be highly variable, ranging from solitary to highly

structured social societies. Species are generally categorized into social systems based on qualitative observations of life history traits (but see Aviles & Harwood (2012); Silk, Cheney & Seyfarth (2013)). The degree of social complexity of many species has, however been recently debated based on the structure of their interaction networks (Mourier, Vercelloni & Planes, 2012; Sah *et al.*, 2016). Since interaction patterns are key to assessing the social complexity, can the structure of interaction networks be used to quantify the differences among the different social systems? To answer this question, we compared the structural characteristics associated with the interaction networks of species typically characterized as *solitary*, *fission-fusion*, *social* and *socially hierarchical*. The evidence that we present here suggests that, at the least, solitary, fission-fusion, and higher social organizations can be distinguished from each other based on (a) degree of variation among social partners, (b) the extent to which the interaction network is divided into cohesive social groups (i.e., the level of network fragmentation) and (c) the proportion of individuals that occupy socially central positions in the interaction networks (i.e, the average betweenness centrality of the network). Remarkably, these differences exist between the social systems in spite of differences in the data collection methodology, type of interaction recorded and the interaction weighting criterion.

*Social* and *fission-fusion* species are typically considered to have large degree heterogeneity (e.g. bottlenose dolphins Lusseau *et al.* (2003), wire-tailed manakins Ryder *et al.* (2008)). Our results, however, show that the degree heterogeneity in *relatively solitary* species is much higher than the other social systems. Large variation in the nodal degree in solitary species indicates that a small proportion of individuals interact with a large number of conspecifics, which could arise simply

282 due to a high variation in spatial behavior as compared to other social species  
 283 (Pinter-Wollman, 2015; Sah *et al.*, 2016). Our results also show that the interac-  
 284 tion networks of *fission-fusion* species are the most fragmented followed by *social*  
 285 species. Networks of *relatively solitary* and *socially hierarchical* species, on the  
 286 other hand, were the least subdivided. Interaction networks of animal societies  
 287 are ubiquitously divided into socially-cohesive groups (Sah *et al.*, 2014; Griffin &  
 288 Nunn, 2011). Presence of many small, socially cohesive groups within interac-  
 289 tion networks of *fission-fusion* species can be explained based on the behavioral  
 290 tendency to frequently switch affiliative partners; as a result, individuals form con-  
 291 sistent social bonds with a small number of individuals (Rubenstein *et al.*, 2015).  
 292 Social species often form groups based on sex/age class, kinship and functional  
 293 roles (Kanngiesser *et al.*, 2011), and modular subdivisions has been shown in the-  
 294 oretical models to promote behavioural diversity and cooperation (Whitehead &  
 295 Lusseau, 2012; Gianetto & Heydari, 2015). Social species may therefore limit  
 296 group size to maximize benefits of cooperation, making their interaction networks  
 297 fragmented (Marcoux & Lusseau, 2013).

## 298 **Disease implications of network structure and the social sys-** 299 **tems**

300 Social complexity is expected to have major implications towards infectious disease  
 301 spread, and social species living in large groups are assumed to experience larger  
 302 disease costs than other social systems (Altizer *et al.*, 2003). However, our study  
 303 demonstrates that the disease implications of social organization extend beyond a  
 304 simple dependence on group size, and organization of interactions within groups

has important implications towards the disease costs of social complexity. Our results demonstrate that species with temporary or permanent hierarchical social organization experience larger outbreaks, and are vulnerable to outbreaks turning into epidemics as compared to other social systems. This is because interaction networks of *socially hierarchical* species are less fragmented, and individuals tend to have a similar number of social partners (i.e., low degree heterogeneity). In contrast, non-hierarchical *social* species and *fission-fusion* species experience lower disease costs because their interaction networks are highly fragmented. Disease burden in *relatively solitary* species is also lower than *socially hierarchical* species owing to the high variation in the number of social partners among individuals.

Our analysis of the role of network structure in disease transmission revealed that the networks with high degree heterogeneity have lower outbreak sizes, shorter outbreak duration and have a lower risk of turning into epidemics (Figure 4). This is because heterogeneous degree networks have a larger proportion of low degree individuals as compared to homogeneous networks, and have a minority of large-degree superspreaders. As the proportion of higher degree individuals is rare, an infectious disease outbreak rapidly depletes these super-spreaders and must infect lower-degree individuals in order to propagate through the entire network, where the risk of stochastic extinction is higher. Typical disease outbreaks therefore die sooner in degree heterogeneous networks after infecting a small proportion of individuals. In contrast, homogeneous networks with the same edge density have a higher proportion high degree nodes, and therefore local depletion of highly connected nodes occurs more slowly, leading to larger and longer disease outbreaks (Meyers *et al.*, 2005; Kiss, Green & Kao, 2006). Our disease simulations also show that network fragmentation lowers the duration of disease outbreaks and epidemic



probability of low, but not of moderately and highly transmissible infectious diseases. A recent study has shown that network fragmentation is one of the two mechanistic features that drive modular subdivisions in animal social networks (Sah, P, unpublished data). High network fragmentation limits the global spread of infectious diseases by localizing infections to a small portion within the interaction networks (structural trapping), but can also enhance local transmission and cause structural delay of infection spread (Sah, P, unpublished data). Our results suggest that the infectious diseases from low transmissible pathogens experience strong structural trapping in fragmented networks, and therefore experience rapid extinction after infecting a local pocket of individuals in the network. In contrast, pathogens that are at least moderately transmissible avoid stochastic extinction by reaching the "bridge" nodes within the subdivided network, but experience delay in transmission due to the presence of structural bottlenecks.

### **Behavioral plasticity of individuals in different social systems towards increasing group size**

Although living in groups confers several benefits to group members, change in group size can act as a potent stressor. Increase in group size, on one hand, can elevate the cost of group living, including higher resource competition, but on the other may also increase group-living benefits (e.g., better protection against predators and improved chances of winning between-group competition). Our study demonstrates that all species, irrespective of social complexity, can adjust their social behavior in response to the changes in their social environment. This behavioral plasticity is expected to depend on perceived costs and benefits of group living and species sociality (Gogarten *et al.*, 2014; Hubbard & Blumstein, 2015; Maldonado-Chaparro, Hubbard & Blumstein, 2015). Our results show that

355 individuals in *socially hierarchical* societies increase the number of social partners  
 356 proportionate to the group size in order to maintain the overall group connectivity,  
 357 probably due to higher perceived benefits of group living. *Solitary* and *fission-*  
 358 *fusion* species, on the other hand, may perceive higher costs with larger groups  
 359 and therefore reduce group connectivity with increasing group size. Interestingly,  
 360 group connectivity of *social* species also reduces in larger groups, which suggests  
 361 that many social species experience constraints on sociality (Maldonado-Chaparro,  
 362 Hubbard & Blumstein, 2015).

363 The knowledge of how group connectivity scales with group size is critical to  
 364 make valid predictions about pathogen transmission rates across different pop-  
 365 ulations. In theory, density- and frequency-dependent models of infectious dis-  
 366 ease spread have been popularly based on two distinct assumptions about how  
 367 transmission scales with the host group size (McCallum, Barlow & Hone, 2001).  
 368 Frequency-dependent model of disease transmission assumes that the connectivity  
 369 of hosts is constant across group sizes, and therefore *per capita* transmission rate  
 370 declines with increasing host group size. In contrast, density-dependent trans-  
 371 mission models assume linear scaling of group connectivity with group size and  
 372 constant per capita transmission rate across host groups (Ferrari *et al.*, 2011).  
 373 Density-dependent transmission is typically assumed as a valid model for social  
 374 hosts (Anderson & May, 1978), although species specific empirical evidences have  
 375 been conflicted (Vander Wal, Yip & McLaughlin, 2012; Cross *et al.*, 2013). Our re-  
 376 sults demonstrate that the density-dependent transmission model may be valid for  
 377 *socially hierarchical* irrespective of pathogen transmission mode, but not for other  
 378 social or solitary species. We did not find evidence for frequency-dependent trans-  
 379 mission, as individual in all the social systems did increase their social partners

380 with increasing group size.

## 381 Conclusions

382 Despite the current challenges of comparing networks, our study revealed striking  
 383 differences in the interaction networks of species categorized into four broad social  
 384 systems - relatively solitary, fission-fusion, social and socially hierarchical. At the  
 385 least, the social organization of these social systems differs in terms of (a) degree  
 386 heterogeneity among social partners, (b) extent of network fragmentation and (c)  
 387 the tendency of individuals to occupy central positions within the interaction net-  
 388 work. Disease simulations show that, contrary to the expectation of higher disease  
 389 costs of group living for social species, the organization of interaction networks can  
 390 act as a first-line of defense for *social* and *fission-fusion* species. We also show that  
 391 the individual's behavioral response to larger groups can be different depending  
 392 on the social organization of the species, probably due to the perceived trade-off  
 393 between benefits and costs of living in larger groups. These findings shed new light  
 394 on the association between group living and disease transmission, and evolution  
 395 of social strategies to alleviate the disease costs of group living. In conclusion,  
 396 we note that there is an enormous potential of adopting a comparative approach  
 397 to study the commonalities and differences in the interaction networks across a  
 398 wide range of across taxonomic groups and social systems. Although we limit our  
 399 discussion to the disease implications of animal sociality and social network struc-  
 400 ture, comparative network approaches can be used to quantitatively test several  
 401 other evolutionary and ecological hypotheses, including the ones on group living,  
 402 social complexity, information transfer, and resilience to population stressors.

## 403 Materials and methods

### 404 Dataset

405 We first conducted electronic searches in *Google Scholar* and popular data reposi-  
 406 tories, including *Dryad Digital Repository* and *figshare* for relevant network dataset  
 407 associated with peer-reviewed publications. We used the following terms to per-  
 408 form our search: social network, social structure, contact network, interaction  
 409 network, network behavior, animal network, behavior heterogeneity and social or-  
 410 ganization. Only studies on non-human species were considered in our primary  
 411 search. Studies reporting non-interaction networks (such as biological networks,  
 412 food-web networks) were excluded. By reviewing the quality of published net-  
 413 works datasets, we selected 666 social networks spanning 47 animal species and 18  
 414 taxonomic order. Edge connections of these networks summarized several differ-  
 415 ent types of interaction between animals, including dominance, grooming, physical  
 416 contact, spatial proximity, food-sharing (trophallaxis), foraging, and interactions  
 417 based on the asynchronous use of a shared resource. Fig. 1 summarizes the species,  
 418 the number of networks and the reported interaction types contributed by each  
 419 taxonomic order represented in the study.

### 420 Structure of interaction networks associated with the social 421 systems

422 To examine the structure of networks associated with the four social systems,  
 423 we used a Bayesian mixed-model approach using the *MCMCglmm* package in R  
 424 (Hadfield, 2010), with four response sociality levels - *relatively solitary*, *fission-*

425 *fusion*, *social* and *socially hierarchical*. As fixed effects within our model we in-  
 426 cluded the following network measures (Table S1): degree heterogeneity, degree  
 427 homophily, clustering coefficient, weighted clustering coefficient, transitivity, be-  
 428 tweenness centrality, weighted betweenness centrality, average group size, network  
 429 fragmentation, group cohesion, relative modularity and network diameter. Com-  
 430 munity structure, or the number and composition of groups within each animal  
 431 interaction network was estimated using the Louvain method (Blondel *et al.*, 2008).  
 432 We also included the number of nodes and edges in the network to provide a sta-  
 433 tistical control for any variability in the sampling effort, and average edge weight  
 434 was included to control for different edge weighting criteria. All continuous fixed-  
 435 effects were centered (by subtracting their averages) and scaled to unit variances  
 436 (by dividing by their standard deviation) to assign each continuous predictor with  
 437 the same prior importance in the analysis (Schielzeth, 2010).

438 Traditional random-effect models assume that each data-point is independent.  
 439 However, in meta-analysis involving multiple taxonomic groups, it is necessary to  
 440 control for non-independence arising from shared evolutionary histories of species.  
 441 We therefore controlled for phylogenetic relationships in the analyses by including  
 442 a correlation matrix derived from phylogeny as a random factor. The phylogenetic  
 443 relationship of all species in the database was estimated from the NCBI taxonomy  
 444 database using phyloT (<http://phylot.biobyte.de>). We also controlled for repeated  
 445 measurements within groups and the type of interaction recorded by including  
 446 *group* and *interaction type* as random effects in the analysis.

447 We avoid model selection and present the results of the full model, so that  
 448 the fitted estimates are conditional on the values of all predictors and the esti-  
 449 mated confidence interval are more robust (Harrell, 2002). A potential drawback

of including all predictors in the model is the presence of multicollinearity between different network measures. We therefore estimated Variance inflation factor (VIF) for each covariate in the fitted model, and covariates with VIF greater than 3 were sequentially removed to obtain the final model formulation. We used a weakly informative Gelman prior for fixed effects and parameter-expanded priors for the random effects to improve mixing and decrease the autocorrelation among iterations (Gelman, 2006). Specifically, a  $\chi^2$  distribution with 1 degree of freedom was used as suggested by Hadfield (2014). We ran three MCMC chains for 15 million iterations, with a thinning interval of 1000 after burn-in of 50,000. Convergence of chains was assessed using the Gelman-Rubin diagnostic statistic (Gelman & Rubin, 1992) in the *coda* package (Plummer *et al.*, 2006).

## Disease implications of network structure and the social systems

### Disease simulations

We performed Monte-Carlo simulations of discrete-time susceptible-infected-recovered (SIR) model of disease spread through each network in our database. For disease simulations, we ignored the weights assigned to social interactions between individuals, because the impact of weight (whether they represent contact duration, frequency or intensity) is generally unclear and is usually context-dependent. Transmissibility of the simulated pathogen was defined as the probability of infection transmission from an infected to susceptible host during the infectious period of the host. Assuming the individual's recovery and infection transmission to be a Poisson process, pathogen transmissibility can be calculated as  $T = \frac{\beta}{\beta + \gamma}$ , where

$\beta$  and  $\gamma$  is the infection and recovery probability parameter, respectively. Each disease simulation was initiated by infecting a randomly chosen individual in the social group. At subsequent time steps every infected individual(s) in the population could either transmit infection to a susceptible neighbor with probability parameter  $\beta$  or recover with probability  $\gamma$ . The disease simulation were terminated when there were no remaining infected individuals in the network. We performed disease simulations of pathogens with a wide range of trasmissibility (0.001 to 0.5). Disease simulations for each value of pathogen transmissibility and social network were summarized using three measures: (a) Epidemic probability, measured as the proportion of simulations that ended up infecting at least 15% of individuals present in the interaction network, (b) outbreak size, or the average proportion of individuals infected and (c) outbreak duration, measured as the time interval between the beginning of an outbreak and the time the last infected individual in the interaction network recovers.

## Statistical analysis

We used multivariate Bayesian-MCMC framework to establish disease costs of network measures and species sociality. Epidemic probabilities across different pathogen transmissibility were entered as the (multivariate) response variables. To evaluate the role of network structure on the probability of large outbreaks, network measures identified in the final model of the previous analysis were included as predictors. We repeated the analysis with species sociality as predictor to directly estimate the vulnerability of different social systems towards disease transmission. In both the models, number of nodes and number of edges were included as predictors to control for variability in sampling effort and edge weighting

criteria. (Average edge weights were not included because disease simulations were performed over unweighted networks). Phylogenetic correlations, group identification and the interaction type were included as the random effects in the analysis. Similar models were used to estimate the implications of network structure and social system towards the size and duration of outbreaks by replacing epidemic probability with outbreak size and duration as (multivariate) response terms, respectively.

## Behavioral plasticity of individuals in different social systems towards increasing group size

We first identified group size and composition within each interaction network in the database using the Louvain algorithm (Blondel *et al.*, 2008) that showed strong modular subdivisions (relative modularity,  $Q_{rel} > 0.3$ ). For each social group, the following four network measures that are related to disease transmission were estimated - average individual degree, average individual strength, average pairwise strength and group connectivity (Table S1). To assess how individuals of different social systems respond to increase in group size we used a linear mixed model implemented in the *lme4* package in R (version 3.2.3; R Development Core Team 2015). Four separate models were run, each with one of the four network measures as the response variable, and group size interacted with species sociality (relatively solitary, fission-fusion, social and socially hierarchical) as the fixed effect. The interaction network nested within species and type of interaction recorded was included as a random effect to control for repeated measurements within species and variation in data-collection methods.



## 520 Acknowledgements

521 This work was supported by the National Science Foundation Ecology and Evolu-  
522 tion of Infectious Diseases grant 1216054.

## 523 Data accessibility

524 The data for all animal interaction network measures used in the study, and ref-  
525 erences where the actual network can be accessed, is available through the Bansal  
526 Lab Dataverse at (link).

## 527 References

- 528 Altizer, S., Nunn, C.C.L., Thrall, P.P.H., Gittleman, J.L.J., Antonovics, J., Cun-  
529 ningham, A.A.a., Dobson, A.A.P.A., Ezenwa, V., Jones, K.K.E.K., Pedersen,  
530 A.A.B., Poss, M. & Pulliam, J.J.R.J. (2003) Social organization and parasite  
531 risk in mammals: Integrating theory and empirical studies. *Annual Review of*  
532 *Ecology, Evolution, and Systematics*, **34**, 517–547.
- 533 Anderson, R.M. & May, R.M. (1978) Regulation and stability of host-parasite  
534 population interactions. *Journal of Animal Ecology*, **47**, 219–247.
- 535 Aplin, L.M., Farine, D.R., Morand-Ferron, J., Cole, E.F., Cockburn, A. & Sheldon,  
536 B.C. (2013) Individual personalities predict social behaviour in wild networks of  
537 great tits (*Parus major*). *Ecology Letters*, **16**, 1365–1372.
- 538 Aplin, L.M., Farine, D.R., Morand-Ferron, J. & Sheldon, B.C. (2012) Social net-

- works predict patch discovery in a wild population of songbirds. *Proceedings of the Royal Society B: Biological Sciences*, **279**, 4199–4205.
- Arnold, W. & Anja, V.L. (1993) Ectoparasite loads decrease the fitness of alpine marmots (*Marmota marmota*) but are not a cost of sociality. *Behavioral Ecology*, **4**, 36–39.
- Aviles, L. & Harwood, G. (2012) A Quantitative Index of Sociality and Its Application to Group-Living Spiders and Other Social Organisms. *Ethology*, **118**, 1219–1229.
- Blondel, V.D., Guillaume, J.L., Lambiotte, R. & Lefebvre, E. (2008) Fast unfolding of communities in large networks. *Journal of Statistical Mechanics: Theory and Experiment*, **2008**, P10008.
- Casey, C., Charrier, I., Mathevon, N. & Reichmuth, C. (2015) Rival assessment among northern elephant seals: evidence of associative learning during male-male contests. *Royal Society open science*, **2**, 150228.
- Castles, M., Heinsohn, R., Marshall, H.H., Lee, A.E.G., Cowlshaw, G. & Carter, A.J. (2014) Social networks created with different techniques are not comparable. *Animal Behaviour*, **96**, 59–67.
- Cremer, S., Armitage, S.a.O. & Schmid-Hempel, P. (2007) Social immunity. *Current biology : CB*, **17**, R693–702.
- Cross, P.C., Creech, T.G., Ebinger, M.R., Manlove, K., Irvine, K., Henningsen, J., Rogerson, J., Scurlock, B.M. & Creel, S. (2013) Female elk contacts are neither frequency nor density dependent. *Ecology*, **94**, 2076–2086.

- 561 Dunbar, R.I.M. (1992) Neocortex size as a constraint on group size in primates.  
562 *Journal of Human Evolution*, **22**, 469–493.
- 563 Farine, D.R. & Whitehead, H. (2015) Constructing, conducting, and interpreting  
564 animal social network analysis. *The Journal of animal ecology*, pp. 1144–1163.
- 565 Faust, K. (2006) Comparing Social Networks : Size , Density , and Local Structure.  
566 *Metodološki zvezki*, **3**, 185–216.
- 567 Faust, K. & Skvoretz, J. (2002) Comparing Network Across SPACE AND TIME  
568 , SIZE AND Species. *Other*, **32**, 267–299.
- 569 Ferrari, M.J., Perkins, S.E., Pomeroy, L.W. & Bjørnstad, O.N. (2011) Pathogens,  
570 social networks, and the paradox of transmission scaling. *Interdisciplinary per-*  
571 *spectives on infectious diseases*, **2011**, 267049.
- 572 Franz, M., Altmann, J. & Alberts, S.C. (2015) Knockouts of high-ranking males  
573 have limited impact on baboon social networks. *Current Zoology*, **61**, 107–113.
- 574 Gelman, A. & Rubin, D.B. (1992) Inference from iterative simulation using mul-  
575 tiple sequences. *Statistical science*, pp. 457–472.
- 576 Gelman, A. (2006) Prior distributions for variance parameters in hierarchical mod-  
577 els (Comment on Article by Browne and Draper). *Bayesian Analysis*, **1**, 515–534.
- 578 Gianetto, D.A. & Heydari, B. (2015) Network Modularity is essential for evolution  
579 of cooperation under uncertainty. *Scientific Reports*, **5**, 9340.
- 580 Godfrey, S.S., Bull, C.M., James, R. & Murray, K. (2009) Network structure and  
581 parasite transmission in a group living lizard, the gidgee skink, *Egernia stokesii*.  
582 *Behavioral Ecology and Sociobiology*, **63**, 1045–1056.

- 583 Gogarten, J.F., Bonnell, T.R., Brown, L.M., Campenni, M., Wasserman, M.D. &  
584 Chapman, C.A. (2014) Increasing Group Size Alters Behavior of a Folivorous  
585 Primate. *International Journal of Primatology*, **35**, 590–608.
- 586 Griesser, M., Ma, Q., Webber, S., Bowgen, K. & Sumpter, D.J.T. (2011) Under-  
587 standing animal group-size distributions. *PLoS ONE*, **6**.
- 588 Griffin, R.H. & Nunn, C.L. (2011) Community structure and the spread of infec-  
589 tious disease in primate social networks. *Evolutionary Ecology*, **26**, 779–800.
- 590 Grueter, C.C., Matsuda, I., Zhang, P. & Zinner, D. (2012) Multilevel Societies in  
591 Primates and Other Mammals: Introduction to the Special Issue. *International*  
592 *Journal of Primatology*, **33**, 993–1001.
- 593 Hadfield, J. (2014) MCMCglmm course notes.
- 594 Hadfield, J.D. (2010) MCMC methods for multi-response generalized linear mixed  
595 models: The MCMCglmm R package. *Journal of Statistical Software*, **33**, 1–22.
- 596 Harrell, F. (2002) *Regression Modeling Strategies*. Springer Series in Statistics, 1st  
597 edn.
- 598 Hirsch, B.B.T., Prange, S., Hauver, S.S.a. & Gehrt, S.S.D. (2013) Raccoon Social  
599 Networks and the Potential for Disease Transmission. *PLoS ONE*, **8**, 4–10.
- 600 Hock, K. & Fefferman, N.H. (2012) Social organization patterns can lower disease  
601 risk without associated disease avoidance or immunity. *Ecological Complexity*,  
602 **12**, 34–42.

- Hubbard, L. & Blumstein, D.T. (2015) Group size affects social relationships in yellow-bellied marmots (*Marmota flaviventris*) Adriana A. Maldonado-Chaparro<sup>1</sup>. *Behavioral Ecology*, **26**, 909–915.
- James, R., Croft, D.P. & Krause, J. (2009) Potential banana skins in animal social network analysis. *Behavioral Ecology and Sociobiology*, **63**, 989–997.
- Kanngiesser, P., Sueur, C., Riedl, K., Grossmann, J. & Call, J. (2011) Grooming network cohesion and the role of individuals in a captive chimpanzee group. *American Journal of Primatology*, **73**, 758–767.
- Kiss, I.Z., Green, D.M. & Kao, R.R. (2006) Infectious disease control using contact tracing in random and scale-free networks. *Journal of the Royal Society, Interface / the Royal Society*, **3**, 55–62.
- Krause, J., James, R., Franks, D.W. & Croft, D.P., eds. (2014) *Animal social networks*. Oxford University Press, USA.
- Krause, S., Wilson, A.D., Ramnarine, I.W., Herbert-Read, J.E., Clément, R.J. & Krause, J. (2016) Guppies occupy consistent positions in social networks: mechanisms and consequences. *Behavioral Ecology*, **00**, arw177.
- Kurvers, R.H.J.M., Krause, J., Croft, D.P., Wilson, A.D.M. & Wolf, M. (2014) The evolutionary and ecological consequences of animal social networks: emerging issues. *Trends in ecology & evolution*, **29**, 326–35.
- Lehmann, J. & Dunbar, R.I.M. (2009) Network cohesion, group size and neocortex size in female-bonded Old World primates. *Proceedings of the Royal Society B: Biological Sciences*, **276**, 4417–22.

- 625 Lindenfors, P. (2005) Neocortex evolution in primates: the "social brain" is for  
626 females. *Biology letters*, **1**, 407–10.
- 627 Loehle, C. (1995) Social Barriers to Pathogen Transmission in Wild Animal Popu-  
628 lations. *Ecology*, **76**, 326–335.
- 629 Lusseau, D. & Newman, M.E.J. (2004) Identifying the role that animals play in  
630 their social networks. *Proceedings of the Royal Society B*, **271**, 447–481.
- 631 Lusseau, D., Schneider, K., Boisseau, O.O.J., Haase, P., Slooten, E. & Dawson,  
632 S.S.M. (2003) The bottlenose dolphin community of Doubtful Sound features a  
633 large proportion of long-lasting associations. *Behavioral Ecology and Sociobiol-*  
634 *ogy*, **54**, 396–405.
- 635 Maldonado-Chaparro, a.a., Hubbard, L. & Blumstein, D.T. (2015) Group size af-  
636 fects social relationships in yellow-bellied marmots (*Marmota flaviventris*). *Be-*  
637 *havioral Ecology*, **00**, 1–7.
- 638 Marcoux, M. & Lusseau, D. (2013) Network modularity promotes cooperation.  
639 *Journal of Theoretical Biology*, **324**, 103–108.
- 640 McCallum, H., Barlow, N. & Hone, J. (2001) How should pathogen transmission  
641 be modelled? *Trends in Ecology and Evolution*, **16**, 295–300.
- 642 Meunier, J. (2015) Social immunity and the evolution of group living in insects.  
643 *Philosophical Transactions B of the Royal Society*, **370**, 20140102.
- 644 Meyers, L.A., Pourbohloul, B., Newman, M.E.J., Skowronski, D.M. & Brunham,  
645 R.C. (2005) Network theory and SARS: predicting outbreak diversity. *Journal*  
646 *of theoretical biology*, **232**, 71–81.

- 647 Mourier, J., Vercelloni, J. & Planes, S. (2012) Evidence of social communities in a  
648 spatially structured network of a free-ranging shark species. *Animal Behaviour*,  
649 **83**, 389–401.
- 650 Oh, K.P. & Badyaev, A.V. (2010) Structure of social networks in a passerine  
651 bird: consequences for sexual selection and the evolution of mating strategies.  
652 *American Naturalist*, **176**, E80–E89.
- 653 Pasquaretta, C., Leve, M., Claidiere, N., van de Waal, E., Whiten, A., MacIntosh,  
654 A.J., Pele, M., Bergstrom, M.L., Borgeaud, C., Brosnan, S.F., Crofoot, M.C.,  
655 Fedigan, L.M., Fichtel, C., Hopper, L.M., Mareno, M.C., Petit, O., Schnoell,  
656 A.V., di Sorrentino, E.P., Thierry, B., Tiddi, B. & Sueur, C. (2014) Social  
657 networks in primates: smart and tolerant species have more efficient networks.  
658 *Sci Rep*, **4**, 7600.
- 659 Patterson, J.E.H. & Ruckstuhl, K.E. (2013) Parasite infection and host group size:  
660 a meta-analytical review. *Parasitology*, pp. 1–11.
- 661 Pinter-Wollman, N. (2015) Persistent variation in spatial behavior affects the struc-  
662 ture and function of interaction networks. *Current Zoology*, **61**, 98–106.
- 663 Plummer, M., Best, N., Cowles, K. & Vines, K. (2006) CODA: Convergence diag-  
664 nosis and output analysis for MCMC. *R news*, **6**, 7–11.
- 665 Quevillon, L.E., Hanks, E.M., Bansal, S. & Hughes, D.P. (2015) Social, spatial,  
666 and temporal organization in a complex insect society. *Scientific reports*, **5**,  
667 13393.
- 668 Reynolds, J.J.H., Hirsch, B.T., Gehrt, S.D. & Craft, M.E. (2015) Raccoon contact

- 669 networks predict seasonal susceptibility to rabies outbreaks and limitations of  
670 vaccination. *Journal of Animal Ecology*, **84**, 1720–1731.
- 671 Rifkin, J.L., Nunn, C.L. & Garamszegi, L.Z. (2012) Do Animals Living in Larger  
672 Groups Experience Greater Parasitism? A Meta-Analysis. *The American Nat-*  
673 *uralist*, **180**, 70–82.
- 674 Rubenstein, D.I., Sundaresan, S.R., Fischhoff, I.R., Tantipathananandh, C. &  
675 Berger-wolf, T.Y. (2015) Similar but Different : Dynamic Social Network Anal-  
676 ysis Highlights Fundamental Differences between the Fission-Fusion Societies of  
677 Two Equid Species , the Onager and Grevy ' s Zebra. *PLoS ONE*, **10**, 1–21.
- 678 Ryder, T.B., McDonald, D.B., Blake, J.G., Parker, P.G. & Loiselle, B.A. (2008)  
679 Social networks in the lek-mating wire-tailed manakin (*Pipra filicauda*). *Pro-*  
680 *ceedings of the Royal Society B-Biological Sciences*, **275**, 1367–1374.
- 681 Sah, P., Nussear, K.E., Esque, T.C., Aiello, C.M., Hudson, P.J. & Bansal, S. (2016)  
682 Inferring social structure and its drivers from refuge use in the desert tortoise,  
683 a relatively solitary species. *Behavioral Ecology and Sociobiology*, pp. 1–13.
- 684 Sah, P., Singh, L.O., Clauset, A. & Bansal, S. (2014) Exploring community struc-  
685 ture in biological networks with random graphs. *BMC bioinformatics*, **15**, 220.
- 686 Schielzeth, H. (2010) Simple means to improve the interpretability of regression  
687 coefficients. *Methods in Ecology and Evolution*, **1**, 103–113.
- 688 Silk, J., Cheney, D. & Seyfarth, R. (2013) A practical guide to the study of social  
689 relationships. *Evolutionary Anthropology*, **22**, 213–225.



- 690 Silk, J.B., Beehner, J.C., Bergman, T.J., Crockford, C., Engh, A.L., Moscovice,  
691 L.R., Wittig, R.M., Seyfarth, R.M. & Cheney, D.L. (2009) The benefits of social  
692 capital: close social bonds among female baboons enhance offspring survival.  
693 *Proceedings of the Royal Society B: Biological Sciences*, **276**, 3099–3104.
- 694 Silk, J.B., Beehner, J.C., Bergman, T.J., Crockford, C., Engh, A.L., Moscovice,  
695 L.R., Wittig, R.M., Seyfarth, R.M. & Cheney, D.L. (2010) Strong and consistent  
696 social bonds enhance the longevity of female baboons. *Current Biology*, **20**,  
697 1359–1361.
- 698 de Silva, S., Schmid, V. & Wittemyer, G. (2016) Fission-fusion processes weaken  
699 dominance networks among female Asian elephants in a productive habitat.  
700 *Behavioral Ecology*, **00**, 1–10.
- 701 Sjoberg, M., Albrechtsen, B. & Hjalten, J. (2000) Truncated power laws: a tool for  
702 understanding aggregation patterns in animals? *Ecology Letters*, **3**, 90–94.
- 703 Sundaresan, S.R., Fischhoff, I.R., Dushoff, J. & Rubenstein, D.I. (2007) Net-  
704 work metrics reveal differences in social organization between two fission-fusion  
705 species, Grevy's zebra and onager. *Oecologia*, **151**, 140–149.
- 706 Vander Wal, E., Yip, H. & McLaughlin, P. (2012) Sex-based differences in density-  
707 dependent sociality : an experiment with a gregarious ungulate. *Ecology*, **93**,  
708 206–212.
- 709 Wey, T.W., Burger, J.R., Ebensperger, L.A. & Hayes, L.D. (2013) Reproductive  
710 correlates of social network variation in plurally breeding degus (*Octodon degus*).  
711 *Animal Behaviour*, **85**, 1407–1414.

712 Whitehead, H. & Lusseau, D. (2012) Animal social networks as substrate for cul-  
713 tural behavioural diversity. *Journal of Theoretical Biology*, **294**, 19–28.

## 714 Table captions

715 **Table 1.** Effect size estimates of the generalized linear mixed models (by MCM-  
 716 Cglmm) examining the characteristics of interaction network structure for different  
 717 social systems. Shown are the posterior means of the expected change in log-odds  
 718 of being in focal social system (column headers), as compared to the base social  
 719 system (row headers), with one-unit increase in the network measure. The 95%  
 720 confidence intervals are included in brackets. Significant terms with  $pMCMC <$   
 721 0.05 are indicated in bold, where  $pMCMC$  is the proportion of MCMC samples  
 722 that cross zero.

## 723 Figure captions

724 **Figure 1.** Phylogenetic distribution of non-human species represented in the in-  
725 teraction network dataset used in this study. Numbers next to the inner ring  
726 denote the total networks available for the particular species. The inner and the  
727 middle ring is color coded according to the taxonomic class and the social system  
728 of the species. The colors in the outer ring indicates the type of interaction repre-  
729 sented in the network

730

731 **Figure 2.** A stylized illustration of the network measures used (in the final model)  
732 to characterize the differences in the interaction networks species categorized into  
733 four social-systems: *relatively solitary*, *fission-fusion*, *social* and *socially hierar-*  
734 *chical*. (A) Degree heterogeneity, measured as the coefficient of variation (CV)  
735 of the degree distribution. Shown is the frequency distribution of nodal degrees  
736 for a network with homogeneous degree distribution ( $CV \ll 1$ ), and a network  
737 with an exponential degree distribution ( $CV = 1$ ). (B) Degree homophily ( $\rho$ ), or  
738 the tendency of social partners to have a similar degree. Shown is an example  
739 of a disassortative network, where high degree individuals tend to associate with  
740 low degree individuals ( $\rho < 0$ ), and assortative degree networks, where high de-  
741 gree individuals tend to form social bonds with each other ( $\rho > 0$ ). (C) Average  
742 betweenness centrality, that measures the tendency of nodes to occupy central  
743 position within the interaction network. Shown is an example of a network with  
744 low average betweenness centrality and a network with high average betweenness  
745 centrality. Node colors represent the betweenness centrality values - nodes with  
746 darker colors occupy more central positions within the network. (D) Group cohe-

747 sion measures the tendency of individuals to interact with members of own group.  
 748 The network to the left has three low cohesive social groups, while the network to  
 749 the right has highly cohesive social groups where most of the interactions occur  
 750 within (rather than between) groups. (E) Network fragmentation, measured as the  
 751 log-number of the social groups (modules) present within an interaction network.  
 752 Shown is an example of low (left) and highly (right) fragmented network

753

754 **Figure 3.** Disease costs of social organization due to interaction network struc-  
 755 ture. Disease cost has been quantified in terms of outbreak size (proportion of  
 756 individuals infected in the interaction network), outbreak duration (time to dis-  
 757 ease extinction) and epidemic probability (likelihood of large outbreaks infecting  
 758 at least 15% of individuals in the network) for low ( $=0.1$ ), moderate ( $=0.25$ ) and  
 759 highly ( $=0.5$ ) transmissible pathogen. Error bars represent standard errors, and  
 760 different letters above the bars denote a significant difference between the means  
 761 ( $P < 0.05$ )

762

763 **Figure 4.** Role of network structures in influencing disease transmission. The  
 764 three network measures shown are the ones that were found to differ between  
 765 the four social systems (Table 1). Error bars represent 95% confidence intervals.  
 766 Confidence intervals that do not include zero suggest significant association with  
 767 disease transmission (red = significant effect, black = non-significant effect)

768

769 **Figure 5.** Change in individual social behavior and group connectivity with  
 770 change in social group size across the four social systems. Group size and com-  
 771 position was determined using the community detection algorithm described in

772 Blondel *et al.* (2008). Only those interaction networks that showed strong modu-  
 773 lar subdivisions ( $Q_{rel} > 0.3$ ) were included in this analysis. Error bars represent  
 774 95% confidence intervals, and different letters above the points denote a significant  
 775 difference between the means ( $P < 0.05$ ). Confidence intervals that do not include  
 776 zero suggest significant association with group size (red = significant effect, black  
 777 = non-significant effect)

Table 1:

| Degree heterogeneity   | Focal<br>Base  | Solitary | Fission-fusion              | Social                      | Socially hierarchical       |
|------------------------|----------------|----------|-----------------------------|-----------------------------|-----------------------------|
|                        | Solitary       |          | <b>-4.15 [-7.97, -0.34]</b> | <b>-4.37 [-8.03, -1.22]</b> | <b>-4.47 [-8.74, -0.50]</b> |
|                        | Fission-fusion |          |                             | -0.4 [-4.04, 3.38]          | -0.81 [-4.54, 2.79]         |
|                        | Social         |          |                             |                             | -0.99 [-4.57, 2.63]         |
| Degree homophily       | Focal<br>Base  | Solitary | Fission-fusion              | Social                      | Socially hierarchical       |
|                        | Solitary       |          | -0.29 [-1.91, 1.32]         | -0.54 [-1.90, 0.87]         | -0.71 [-2.36, 0.96]         |
|                        | Fission-fusion |          |                             | -0.23 [-1.80, 1.39]         | -0.44 [-2.06, 1.17]         |
|                        | Social         |          |                             |                             | -0.43 [-1.88, 1.02]         |
| Betweenness centrality | Focal<br>Base  | Solitary | Fission-fusion              | Social                      | Socially hierarchical       |
|                        | Solitary       |          | -3.95 [-8.88, 0.59]         | 0.41 [-2.29, 3.32]          | 1.80 [-1.31, 4.87]          |
|                        | Fission-fusion |          |                             | 2.87 [-0.84, 7.09]          | <b>4.67 [0.87, 8.94]</b>    |
|                        | Social         |          |                             |                             | 1.58 [-0.73, 4.04]          |
| Group cohesion         | Focal<br>Base  | Solitary | Fission-fusion              | Social                      | Socially hierarchical       |
|                        | Solitary       |          | -1.42 [-3.77, 0.79]         | 0.32 [-2.27, 1.64]          | -0.79 [-3.15, 1.55]         |
|                        | Fission-fusion |          |                             | 1.04 [-0.83, 2.90]          | 0.38 [-1.80, 2.48]          |
|                        | Social         |          |                             |                             | -0.21 [-2.08, 1.53]         |
| Network fragmentation  | Focal<br>Base  | Solitary | Fission-fusion              | Social                      | Socially hierarchical       |
|                        | Solitary       |          | <b>6.41 [2.86, 10.00]</b>   | <b>2.62 [-0.13, 5.52]</b>   | 0.51 [-2.94, 3.78]          |
|                        | Fission-fusion |          |                             | <b>-2.96 [-5.69, -0.25]</b> | <b>-4.79 [-7.82, -1.84]</b> |
|                        | Social         |          |                             |                             | -1.50 [-3.95, 1.02]         |

Figure 1: Phylogenetic distribution of non-human species represented in the interaction network dataset used in this study. Numbers next to the inner ring denote the total networks available for the particular species. The inner and the middle ring is color coded according to the taxonomic class and the social system of the species. The colors in the outer ring indicates the type of interaction represented in the network

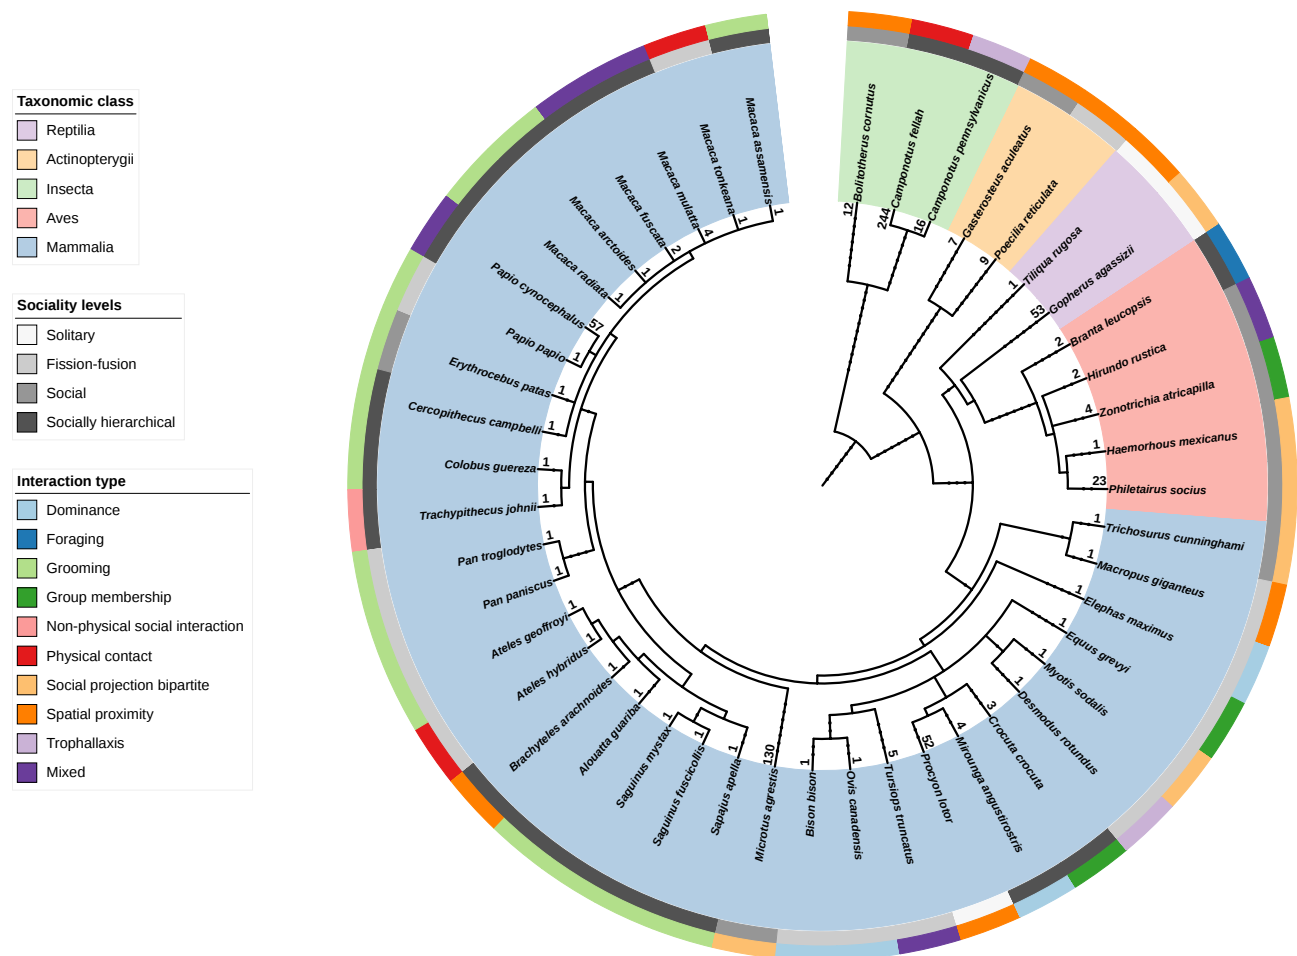



Figure 2:

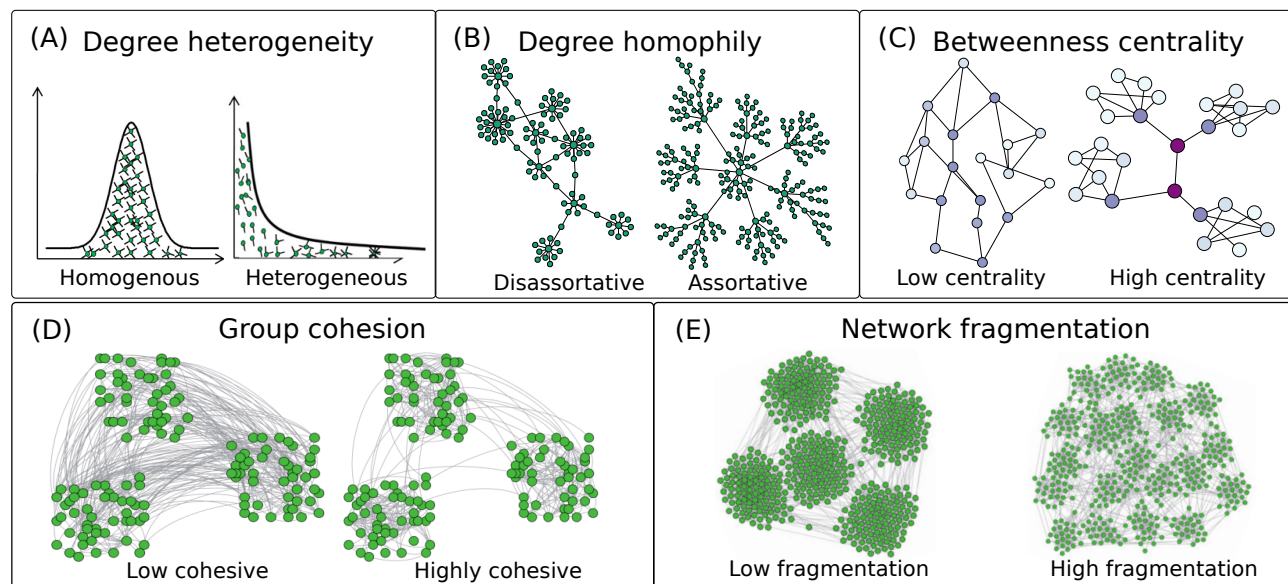

Figure 3:

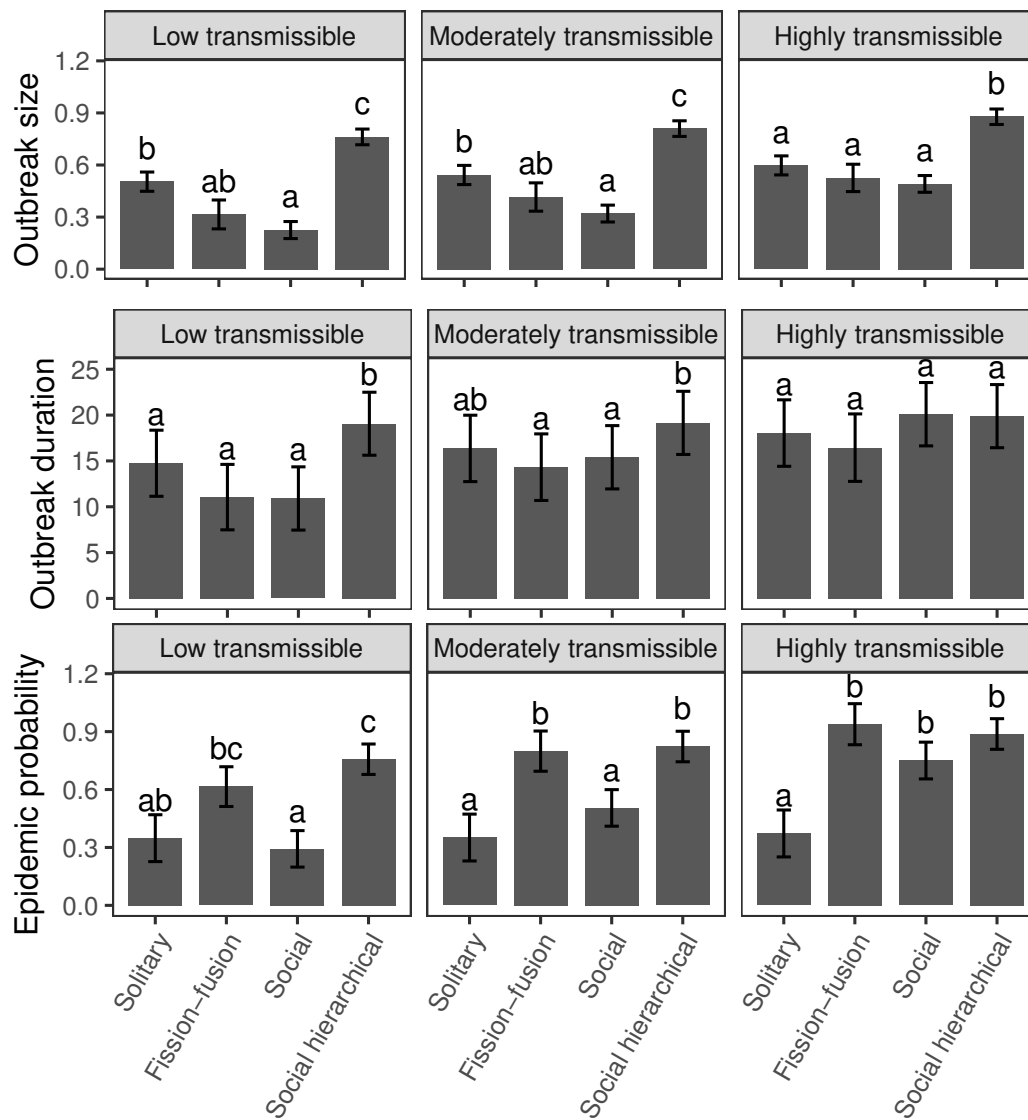

Figure 4:

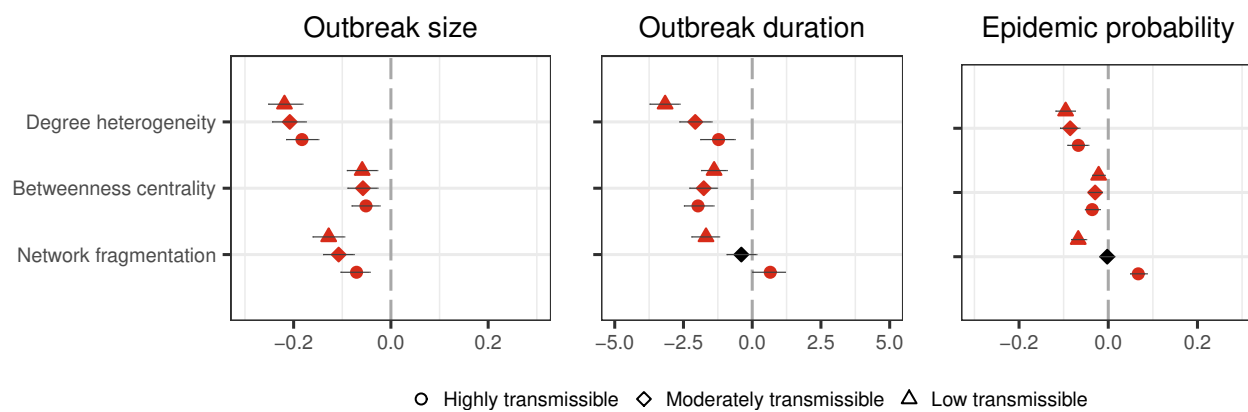

Figure 5:

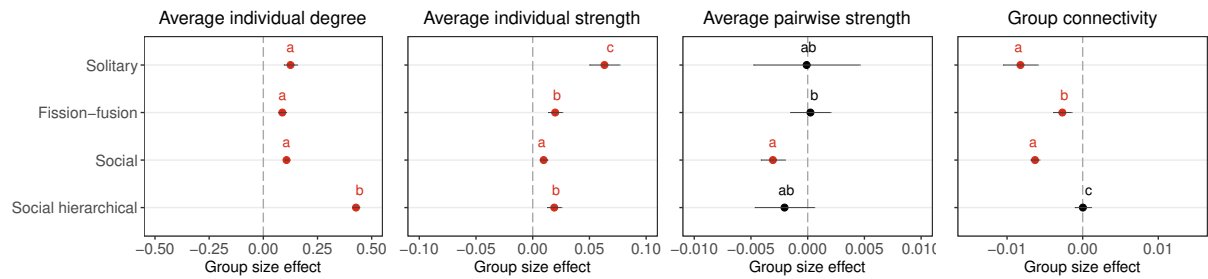

Source: http://biorxiv.org/content/10.1101/106633v1.full.pdf
